# Supplementary material for: Temperature dependent selective gas sorption of the microporous metal-imidazolate framework [Cu(L)] [H2L = 1,4-di(1H-imidazol-4-yl)benzene]
Source: Royal Society of Chemistry journal article supplement (doi:10.1039/c0cc04085a), 2010-11-11
Supplement: c0cc04085a.pdf [file c0cc04085a.pdf]

## *Electronic supplementary information (ESI)*

# **Temperature dependent selective gas sorption of unprecedented stable microporous metal-imidazolate framework**

**Shui-Sheng Chen,<sup>a,c</sup> Min Chen,<sup>a</sup> Satoshi Takamizawa,<sup>b</sup> Man-Sheng Chen,<sup>a</sup> Zhi Su<sup>a</sup> and Wei-Yin Sun\*<sup>a</sup>**

<sup>a</sup> *Coordination Chemistry Institute, State Key Laboratory of Coordination Chemistry, School of Chemistry and Chemical Engineering, Nanjing National Laboratory of Microstructures, Nanjing University, Nanjing 210093, China E-mail: [sunwy@nju.edu.cn](mailto:sunwy@nju.edu.cn); Fax: +86 25 83314502*

<sup>b</sup> *Graduate School of Nanobioscience, Yokohama City University, Kanazawa-ku, Yokohama, Kanagawa 236-0027, Japan*

<sup>c</sup> *School of Chemistry and Chemical Engineering, Fuyang Teachers College, Fuyang 236041, China*

## **Experimental**

### **Materials and methods**

All commercially available chemicals are of reagent grade and were used as received without further purification. The ligand H<sub>2</sub>L was prepared according to the literature.<sup>S1</sup> Elemental analyses of C, H, and N were taken on a Perkin-Elmer 240C elemental analyzer at the analysis center of Nanjing University. Infrared spectra (IR) were recorded on a Bruker Vector22 FT-IR spectrophotometer by using KBr pellets. Thermogravimetric analyses (TGA) were performed on a simultaneous SDT 2960 thermal analyzer under nitrogen with a heating rate of 10 °C min<sup>-1</sup>. Powder X-ray diffraction (PXRD) patterns were measured on a Shimadzu XRD-6000 X-ray diffractometer with Cu K $\alpha$  ( $\lambda = 1.5418 \text{ \AA}$ ) radiation at room temperature. Carbon dioxide (CO<sub>2</sub>) and nitrogen (N<sub>2</sub>) sorption experiments were carried out on a Belsorp-max volumetric gas sorption instrument and methane (CH<sub>4</sub>) and hydrogen (H<sub>2</sub>)

on Autosorb-1MP, Quantachrome. The sample was activated by using the “outgas” function of the surface area analyzer for 10 hours at 160 °C.

### X-ray crystallography

The crystallographic data collections for **1** was carried out on a Bruker Smart Apex CCD area-detector diffractometer with graphite-monochromated Mo  $K\alpha$  radiation ( $\lambda = 0.71073 \text{ \AA}$ ) at 293(2) K using  $\omega$ -scan technique. The diffraction data were integrated by using the *SAINTE* program,<sup>S2</sup> which was also used for the intensity corrections for the Lorentz and polarization effects. Semi-empirical absorption correction was applied using the *SADABS* program.<sup>S3</sup> The structures were solved by direct methods and all the non-hydrogen atoms were refined anisotropically on  $F^2$  by the full-matrix least-squares technique using the SHELXL-97 crystallographic software package.<sup>S4</sup>

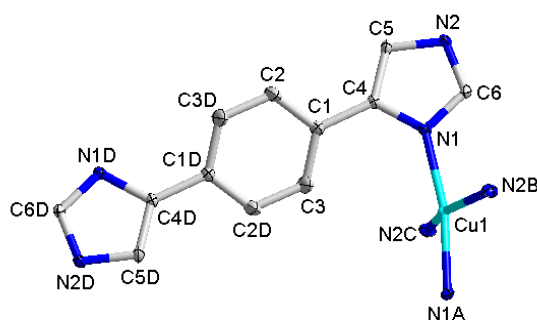

**Figure S1.** The coordination environments of Cu1 atoms in **1**. Atoms with ‘A’, ‘B’, ‘C’ or ‘D’ in labels are symmetry-generated. Symmetry code: A 1+x-y, 2-y, 2.5-z; B 1-y, 1-x, 0.5+z; C 1+x-y, 1+x, 2-z; D 1-x, 2-y, 2-z.

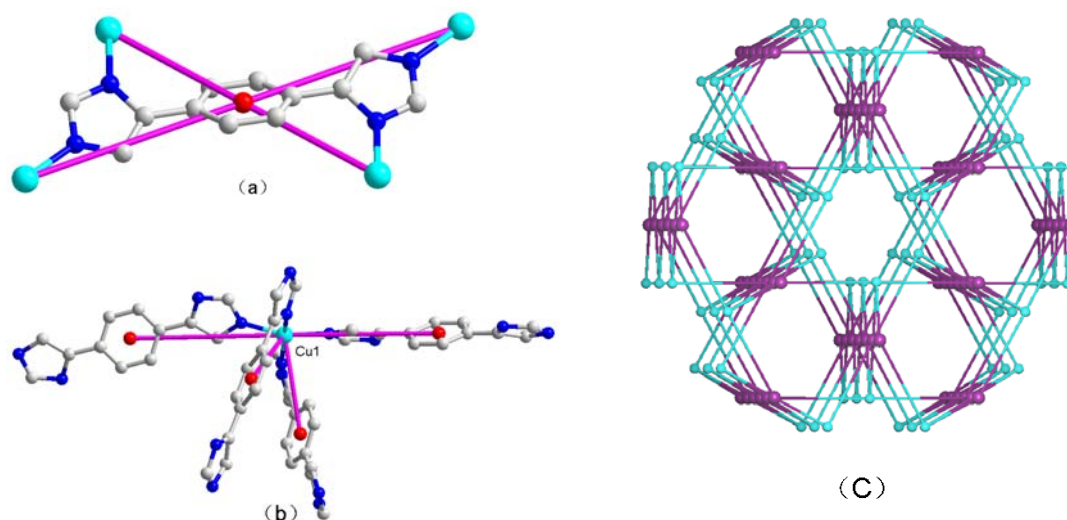

**Figure S2.** (a) View of the 4-connected  $L^{2-}$  ligand. (b) 4-connected node of Cu(II). (c) Schematic representations of the (4, 4)-connected framework of **1** with  $(6^5 \cdot 10)$  topology.

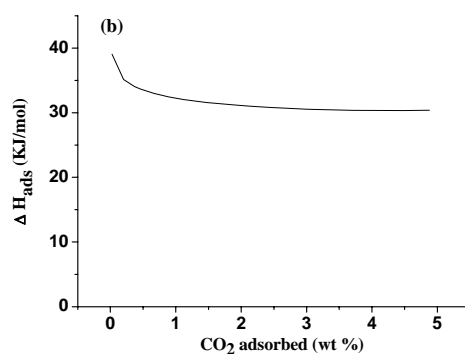

**Figure S3.** CO<sub>2</sub> adsorption enthalpy for **1** calculated from the CO<sub>2</sub> adsorption isotherms at 273 and 298 K.

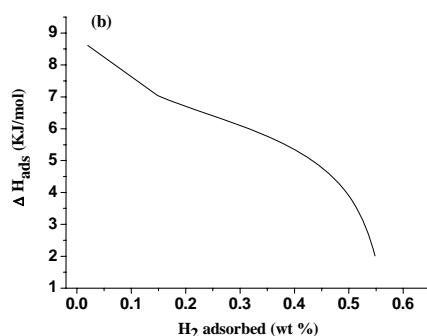

**Figure S4.** H<sub>2</sub> adsorption enthalpy for **1** calculated from the H<sub>2</sub> adsorption isotherms at 77 and 87 K.

#### Analysis of Gas Sorption Isotherms:

The methods are applied to deal with the sorption data according to the literature 14 (*J. Am. Chem. Soc.* 2005, **127**, 9367). The Langmuir-Freundlich equation is used to fit CO<sub>2</sub> and H<sub>2</sub> adsorption isotherms and predict the adsorption capacity of the framework at saturation, and Clausius-Clapeyron equation is employed to calculation the enthalpies of CO<sub>2</sub> and H<sub>2</sub>

adsorption.

$$\ln\left(\frac{P_1}{P_2}\right) = \Delta H_{ads} \times \frac{T_2 - T_1}{RT_1T_2} \quad (\text{I})$$

Where  $P_i$  = pressure for isotherm  $i$

$T_i$  = temperature for isotherm  $i$

$R = 8.315 \text{ J / (K}\cdot\text{mol)}$

The equation (I) can be applied to calculate the enthalpy of adsorption of a gas as a function of the quantity of gas adsorbed. Pressure as a function of the amount of gas adsorbed was determined using the Langmuir-Freundlich fit for the isotherms.

$$\frac{Q}{Q_m} = \frac{BP^{(1/t)}}{1 + BP^{(1/t)}} \quad (\text{II})$$

where  $Q$  = moles adsorbed

$Q_m$  = moles adsorbed at saturation

$P$  = pressure

$B$  and  $t$  are constants

Rearrange (II) to get:

$$P = \left( \frac{Q/Q_m}{B - BQ/Q_m} \right)^t \quad (\text{III})$$

Replace P in equation (I) to obtain:

$$\Delta H_{ads} = \frac{RT_1T_2}{T_2 - T_1} \times \ln \frac{\left( \frac{Q/Q_{m1}}{B_1 - B_1Q/Q_{m1}} \right)^t}{\left( \frac{Q/Q_{m2}}{B_2 - B_2Q/Q_{m2}} \right)^t} \quad (\text{IV})$$

## 1. Dealing with the carbon dioxide adsorption data in details:

(1) Fitting CO<sub>2</sub> adsorption isotherms using the Langmuir-Freundlich equation.

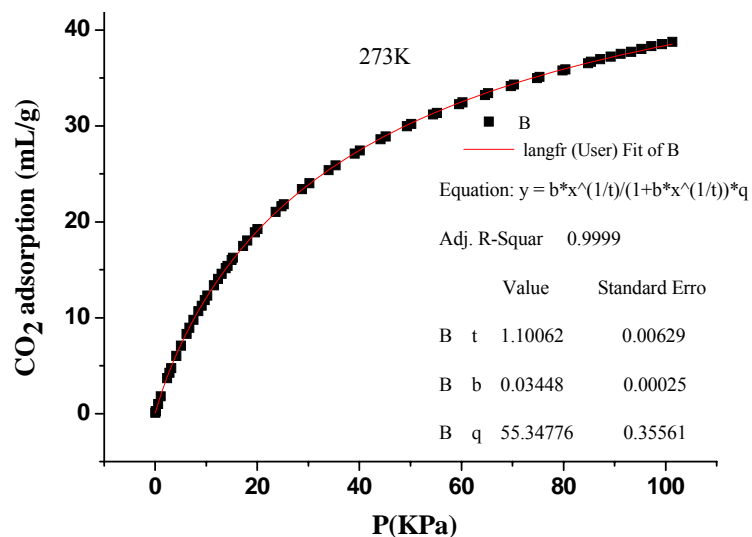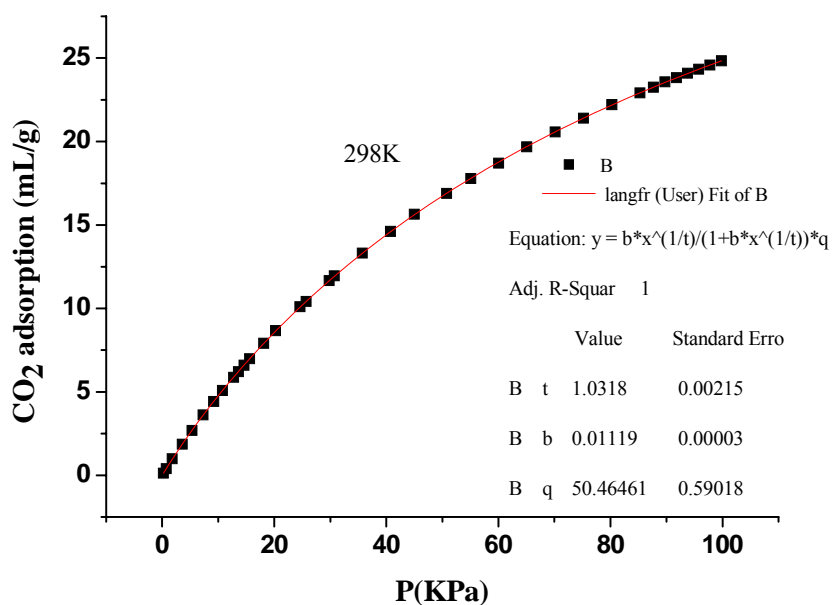

(2) Building the relationship between  $\ln P$  and the quantity of CO<sub>2</sub> adsorbed for the two isotherms by calculating.

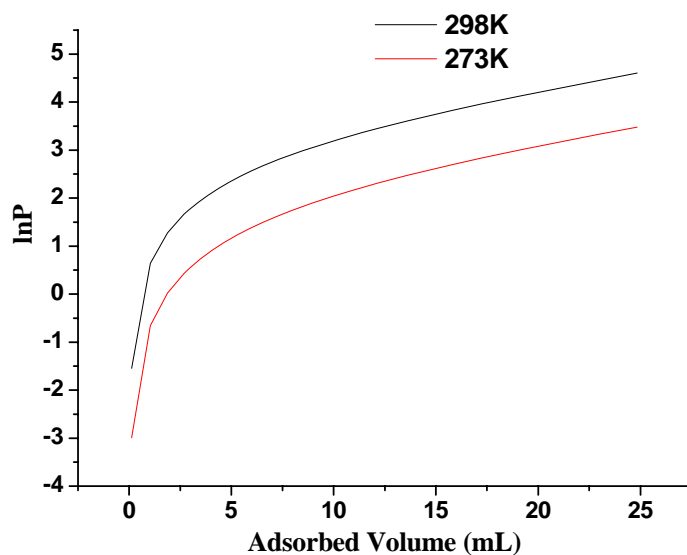

(3) Calculating the  $\Delta H_{\text{ads}}$  using the equation IV.

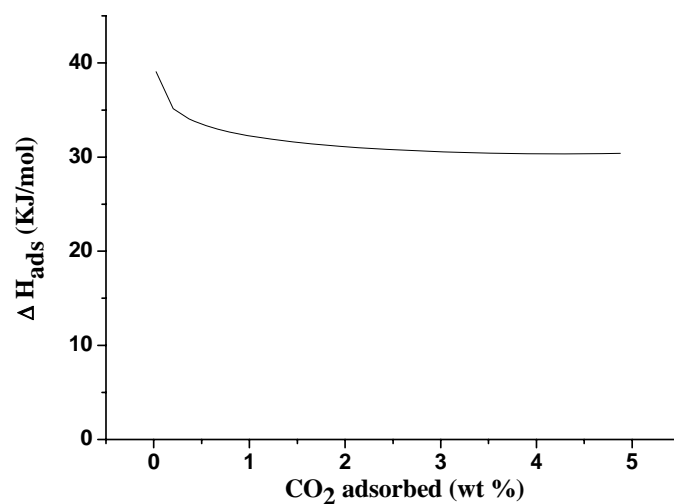

## 2. Calculation of CO<sub>2</sub>/N<sub>2</sub> selectivity

The methods are applied to estimate the CO<sub>2</sub>/N<sub>2</sub> selectivity according to the literature 18a (*J. Am. Chem. Soc.*, 2010, **132**, 38). The ratios of these initial slopes of the CO<sub>2</sub> and N<sub>2</sub> adsorption isotherms were applied to estimate the adsorption selectivity for CO<sub>2</sub> over N<sub>2</sub>.

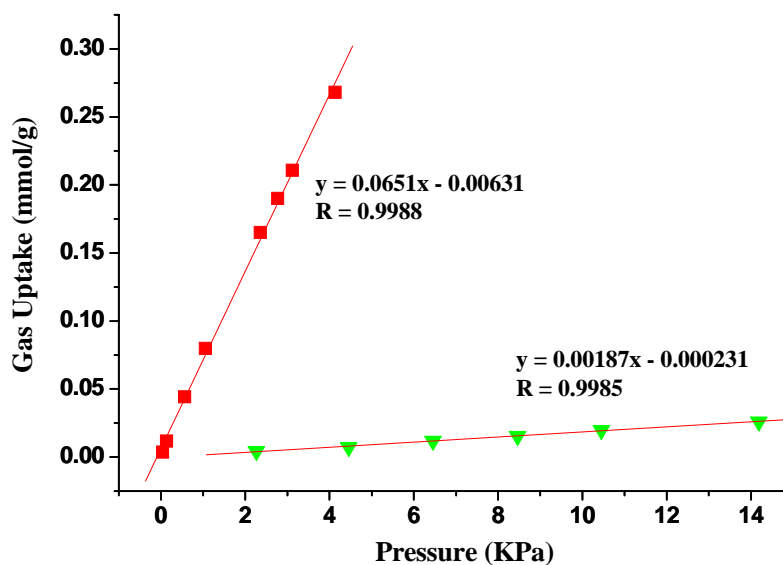

**Figure S6.** The fitting initial slope for CO<sub>2</sub> and N<sub>2</sub> isotherms collected at 273K (CO<sub>2</sub>: red squares; N<sub>2</sub>: green triangles).

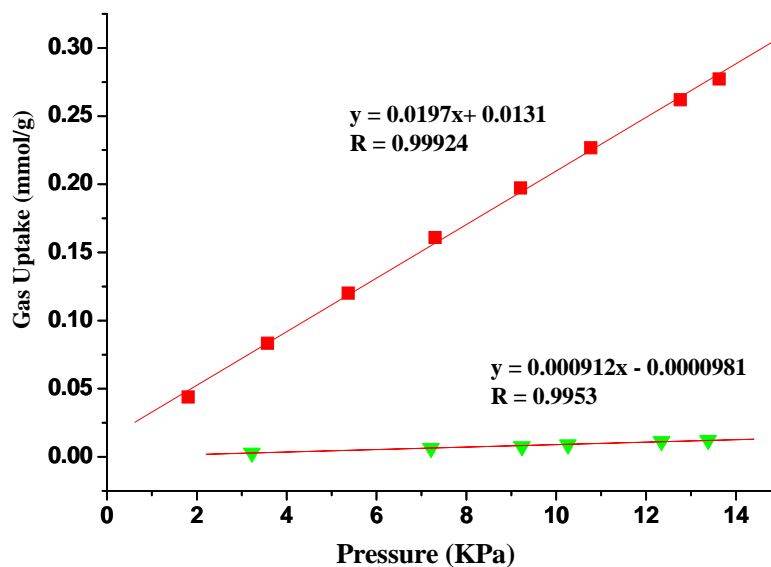

**Figure S7.** The fitting initial slope for CO<sub>2</sub> and N<sub>2</sub> isotherms collected at 298K (CO<sub>2</sub>: red squares; N<sub>2</sub>: green triangles).

### 3. Dealing with the hydrogen adsorption data in details:

(1) Fitting H<sub>2</sub> adsorption isotherms using the Langmuir-Freundlich equation.

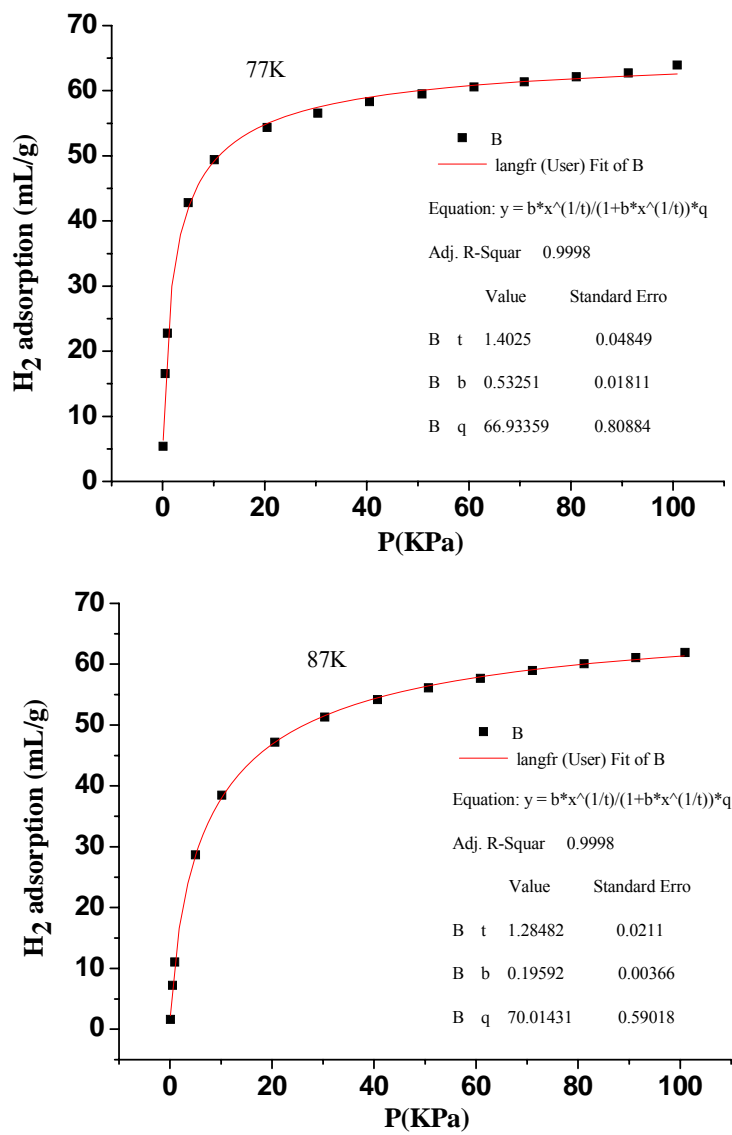

(2) Building the relationship between  $\ln P$  and the quantity of hydrogen adsorbed for the two isotherms by calculating.



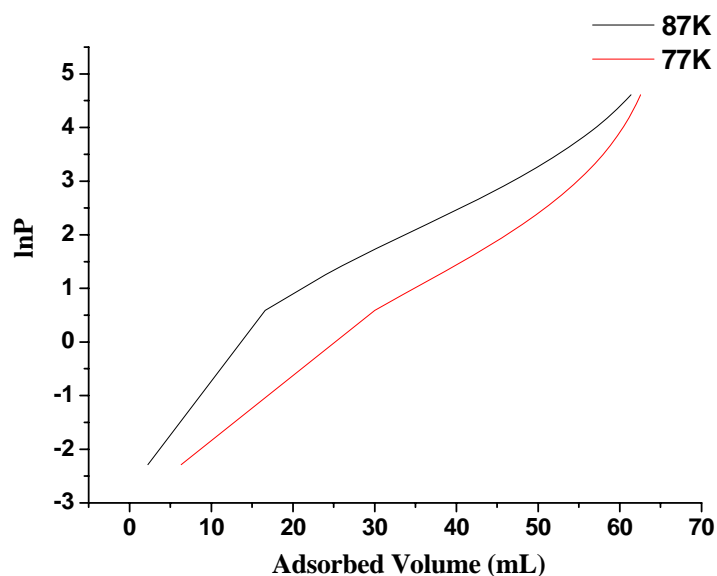

(3) Calculating the  $\Delta H_{\text{ads}}$  using the equation IV.

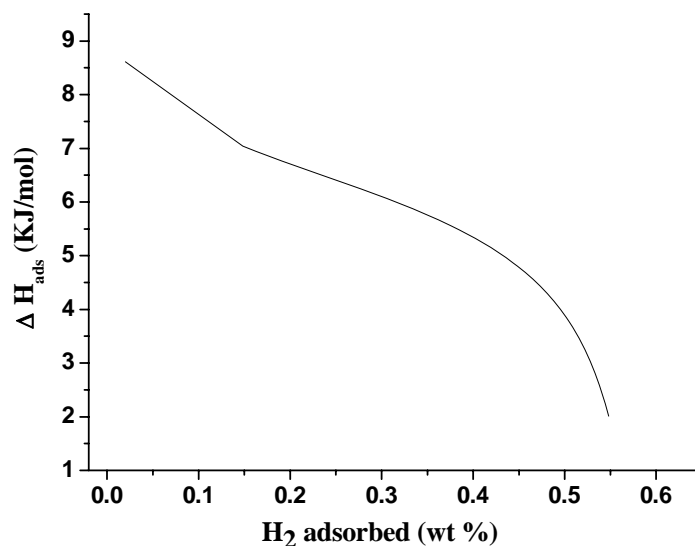

#### Reference:

- S1 (a) R. ten Have, M. Huisman, A. Meetsma and A. M. van Leusen, *Tetrahedron*, 1997, **53**, 11355. (b) S. S. Chen, J. Fan, T.-a. Okamura, M. S. Chen, Z. Su, W. Y. Sun and N. Ueyama, *Cryst. Growth Des.* 2010, **10**, 812.
- S2 *SAINT*, version 6.2; Bruker AXS, Inc., Madison, WI, 2001.
- S3 Sheldrick, G. M. *SADABS*, University of Göttingen, Göttingen, Germany.
- S4 Sheldrick, G. M. *SHELXTL*, version 6.10; Bruker Analytical X-ray Systems, Madison, WI, 2001.
